# Supplementary material
Source: HighWire-hosted journal article supplement (https://tobaccocontrol.bmj.com/highwire/filestream/165762/field_highwire_adjunct_files/1/tc-2022-057764supp002_data_supplement.pdf)
Supplement: tc-2022-057764supp002_data_supplement.pdf [file tc-2022-057764supp002_data_supplement.pdf]

## Supplementary file 2: Points of Departure (PoD)

Table S2: Overview of the available toxicological data of the flavorings.

| Substance name                            | Reference                       | Limit value               | Remarks                                                                                                                                                                                                       |
|-------------------------------------------|---------------------------------|---------------------------|---------------------------------------------------------------------------------------------------------------------------------------------------------------------------------------------------------------|
| 2,3,5-Trimethylpyrazine                   | JECFA, 2002[1]                  | NOAEL: 18 mg/kg bw/day    | 90-day oral study with rats (diet, 1 dose). No observed effects.                                                                                                                                              |
| Damascenone                               | EFSA, 2015[2]                   | TTC 1800 µg/person/day    | Evaluated as part of a group of $\alpha,\beta$ -unsaturated alicyclic ketones.                                                                                                                                |
| Isophorone                                | ECHA, 2022a[3] and NTP, 1986[4] | CMR                       | Harmonised classification Carc. 2 (H351; suspected of causing cancer)                                                                                                                                         |
| beta-Damascone                            | EFSA, 2015[2]                   | TTC 1800 µg/person/day    | Evaluated as part of a group of $\alpha,\beta$ -unsaturated alicyclic ketones.                                                                                                                                |
| (E)-beta-Damascone                        | EFSA, 2015[2]                   | TTC 1800 µg/person/day    | Evaluated as part of a group of $\alpha,\beta$ -unsaturated alicyclic ketones.                                                                                                                                |
| (Z)-beta-Damascone                        | EFSA, 2015[2]                   | TTC 1800 µg/person/day    | Evaluated as part of a group of $\alpha,\beta$ -unsaturated alicyclic ketones.                                                                                                                                |
| Ketoisophorone                            | EFSA, 2015[2]                   | TTC: 540 µg/person/day    | Evaluated as part of a group of $\alpha,\beta$ -unsaturated alicyclic ketones.                                                                                                                                |
| Tabanone                                  | JECFA, 2011[5]                  | NOAEL: 40 mg/kg bw/day    | 14-day oral study with rats (gavage, 0, 40, 200 and 1000 mg/kg bw/day). Based on increased liver weight and decreased spleen weight.                                                                          |
| Beta-Caryophyllene                        | ECHA, 2022b[6]                  | (potentially) sensitizing | Notified classification Skin. Sens. 1B (H317; may cause allergic skin reaction). Based on studies with mice and guinea pigs and a clinical study.                                                             |
| (E)-beta-Damascenone                      | EFSA, 2015[2]                   | TTC: 1800 µg/person/day   | Evaluated as part of a group of $\alpha,\beta$ -unsaturated alicyclic ketones.                                                                                                                                |
| Isovaleric acid                           | EFSA, 2012[7]                   | TTC: 1800 µg/person/day   | Evaluated as part of a group of branched-chain primary aliphatic alcohols/aldehydes/acids, acetals and esters with esters containing branched-chain alcohols and acetals containing branched-chain aldehydes. |
| 2-Hydroxy-3,3,5-trimethyl-2-cyclohexanone | EFSA, 2015[2]                   | TTC: 540 µg/person/day    | Evaluated as part of a group of $\alpha,\beta$ -unsaturated alicyclic ketones.                                                                                                                                |

| Substance name               | Reference                                 | Limit value                                                             | Remarks                                                                                                                                                                                                                      |
|------------------------------|-------------------------------------------|-------------------------------------------------------------------------|------------------------------------------------------------------------------------------------------------------------------------------------------------------------------------------------------------------------------|
| Pyridine                     | IARC, 2019[8]                             | CMR                                                                     | IARC Classification 2B; possibly carcinogenic to humans.                                                                                                                                                                     |
| 3-Acetylpyridine             | EFSA, 2018[9]                             | TTC: 540 µg/person/day                                                  | Evaluated as part of a group of pyridine, pyrrole and quinoline derivatives.                                                                                                                                                 |
| 2-Ethyl-3-methylpyrazine     | JECFA, 2002[1]                            | NOAEL: 5.2 mg/kg bw/day                                                 | 90-day oral study with rats (diet, 1 dose). No observed effects.                                                                                                                                                             |
| 2,6-Dimethoxyphenol          | EFSA, 2008[10]                            | TTC: 1800 µg/person/day                                                 | Evaluated as part of a group of phenol derivatives containing ring-alkyl, ring-alkoxy and side-chains with an oxygenated functional group.                                                                                   |
| <i>p</i> -Cresol             | ECHA, 2022c[11]                           | DNEL of 3.5 mg/m <sup>3</sup> based on an oral NOAEL of 50 mg/kg bw/day | 90-day oral study (gavage, 0, 50, 175 or 600 mg/kg bw/day).                                                                                                                                                                  |
| (-)-Caryophyllene-oxide      | EFSA, 2014[12] and Bauter, 2013[13]       | NOAEL: 109 mg/kg bw/day                                                 | 90-day oral study with rats (diet, 0, 109, 672 and 1398 mg/kg bw/day). Based on mesenteric lymph node pathology.                                                                                                             |
| alpha-Angelica lactone       | JECFA, 1998[14]                           | NOAEL: 17.4 mg/kg/day                                                   | 90-day oral study with rats (drinking water, highest dose). No observed effects.                                                                                                                                             |
| Ambroxide                    | EFSA, 2010[15]                            | TTC: 90 µg/person/day                                                   | Evaluated as part of a group of aliphatic and aromatic ethers.                                                                                                                                                               |
| 3-Ethylpyridine              | EFSA, 2018[9]                             | TTC: 540 µg/person/day                                                  | Evaluated as part of a group of pyridine, pyrrole and quinoline derivatives.                                                                                                                                                 |
| 5-(Hydroxymethyl)-2-furfural | EFSA, 2011[16] derived from NTP, 2010[17] | BMDL: 14.4 mg/kg bw/day                                                 | 90-day oral study with mice (gavage, 0, 47, 94, 188, 375 or 750 mg/kg). Corrected for dose regimen of 5 days/week to continuous daily administration). Based on cytoplasmic alterations in renal proximal tubule epithelium. |
| (3aR)-(+)-Sclareolide        | EFSA, 2014[12]                            | TTC: 90 µg/person/day                                                   | Evaluated as part of a group of epoxides.                                                                                                                                                                                    |

## Abbreviations

BMDL: benchmark dose level  
CLP: Classification, Labelling and Packaging  
CMR: Carcinogenic, Mutagenic, Reprotoxic  
DNEL: derived no effect level  
ECHA: European Chemicals Agency  
EFSA: European Food Safety Authority  
IARC: International Agency for Research on Cancer  
JECFA: Joint FAO/WHO Expert Committee on Food Additives  
NOAEL: no-observed adverse effect level  
NTP: National Toxicology Program  
TTC: threshold of toxicological concern

## References

- [1] Joint FAO/WHO Expert Committee on Food Additives (JECFA). Safety evaluation of certain food additives and contaminants: prepared by the fifty-seventh meeting of the Joint FAO/WHO Expert Committee on Food Additives: World Health Organization 2002.
- [2] European Food Safety Authority (EFSA). Scientific Opinion on Flavouring Group Evaluation 213, Revision 2 (FGE.213Rev2): Consideration of genotoxic potential for  $\alpha,\beta$ -unsaturated alicyclic ketones and precursors from chemical subgroup 2.7 of FGE.19. *EFSA Journal* 2015;**13**(9):1-49.
- [3] European Chemicals Agency (ECHA). REACH dossier 3,5,5-trimethylcyclohex-2-enone. 2022a.
- [4] National Toxicology Program. Toxicology and Carcinogenesis Studies of Isophorone (CAS No. 78-59-1) in F344/N Rats and B6C3F1 Mice (gavage studies). *National Toxicology Program technical report series* 1986;**291**:1-198.
- [5] Joint FAO/WHO Expert Committee on Food Additives (JECFA). Safety evaluation of certain food additives and contaminants: prepared by the Seventy-third meeting of the Joint FAO/WHO Expert Committee on Food Additives (JECFA): World Health Organization 2011.
- [6] European Chemicals Agency (ECHA). REACH dossier caryophyllene. 2022b.
- [7] European Food Safety Authority (EFSA). Scientific Opinion on the safety and efficacy of branched-chain primary aliphatic alcohols/aldehydes/acids, acetals and esters with esters containing branched-chain alcohols and acetals containing branched-chain aldehydes (chemical group 2) when used as flavourings for all animal species. *EFSA Journal* 2012;**10**(10).
- [8] International Agency for Research on Cancer. Some chemicals that cause tumours of the urinary tract in rodents. *IARC Monographs on the Evaluation of Carcinogenic Risks to Humans* 2019;**119**.
- [9] European Food Safety Authority (EFSA). Scientific opinion on flavouring group evaluation 77, revision 3 (FGE. 77Rev3): consideration of pyridine, pyrrole and quinoline derivatives evaluated by JECFA (63rd meeting) structurally related to pyridine, pyrrole, indole and quinoline derivatives evaluated by EFSA in FGE. 24Rev2. *EFSA Journal* 2018;**16**(4):e05226.
- [10] European Food Safety Authority (EFSA). Flavouring Group Evaluation 58 (FGE. 58) Consideration of phenol derivatives evaluated by JECFA (55th meeting) structurally related to ring substituted phenolic substances evaluated by EFSA in FGE. 22 (2006)(Commission Regulation (EC) No 1565/2000 of 18 July 2000)-Opinion of the Scientific Panel on Food Additives, Flavourings, Processing Aids and Materials in contact with Food (AFC). *EFSA Journal* 2008;**6**(5):1-50.
- [11] European Chemicals Agency (ECHA). REACH dossier p-cresol. 2022c.
- [12] European Food Safety Authority (EFSA). Scientific Opinion on Flavouring Group Evaluation 82, Revision 1 (FGE. 82Rev1): consideration of Epoxides evaluated by the JECFA (65th meeting). *EFSA Journal* 2014;**12**(6).
- [13] Bauter MR.  $\beta$ -Caryophyllene: a 90-day dietary study in rats. Product Safety Labs. Study no.33328. 2013.

- [14] Joint FAO/WHO Expert Committee on Food Additives (JECFA). Safety Evaluation of Certain Food Additives and Contaminants. Prepared by the 49th Meeting of the Joint FAO-WHO Expert Committee on Food Additives JECFA: WHO 1998.
- [15] European Food Safety Authority (EFSA). Scientific Opinion on Flavouring Group Evaluation 59, Revision 1 (FGE. 59Rev1): Consideration of aliphatic and aromatic ethers evaluated by JECFA (61st meeting and 63rd meeting) structurally related to aliphatic, alicyclic and aromatic ethers including anisole derivatives evaluated by EFSA in FGE. 23 Rev2 (2010). *EFSA Journal* 2010;9(5):2158.
- [16] European Food Safety Authority (EFSA). Scientific Opinion on Flavouring Group Evaluation 66, Revision 1 (FGE. 66Rev1): Consideration of Furfuryl Alcohol and Related Flavouring Substances Evaluated by JECFA (55th meeting). *EFSA Journal* 2011;9(9).
- [17] National Toxicology Program. NTP toxicology and carcinogenesis studies of 5-(Hydroxymethyl)-2-furfural (CAS No. 67-47-0) in F344/N rats and B6C3F1 mice (gavage studies). *National Toxicology Program technical report series* 2010(554).
